# Supplementary material for: An Observational Study of Service Dogs for Veterans With Posttraumatic Stress Disorder
Source: Atypon-hosted journal article supplement (doi:10.1176/appi.ps.201500383), 2017-03-15
Supplement: appi.ps.201500383.ds001.pdf [file appi.ps.201500383.ds001.pdf]

**Supplementary Table 1. Results of repeated measures t-tests examining pre-post differences among veterans receiving dogs as part of the study.\***

|                                                | Prior to receiving service dog |       | After receiving service dog |       | Effect size (Cohen's <i>d</i> ) | <i>F</i> Test statistic | df   | <i>p</i> value |
|------------------------------------------------|--------------------------------|-------|-----------------------------|-------|---------------------------------|-------------------------|------|----------------|
|                                                | <i>n</i>                       | Mean  | <i>n</i>                    | Mean  |                                 |                         |      |                |
| VR-12 PCS <sup>a</sup>                         | 22                             | 42.46 | 20                          | 40.32 | -0.366                          | 1.9                     | 1,19 | 0.188          |
| VR-12 MCS <sup>a</sup>                         | 22                             | 35.94 | 20                          | 43.08 | 0.758                           | 8.9                     | 1,19 | 0.008          |
| BASIS-Depression <sup>b</sup>                  | 22                             | 2.51  | 20                          | 1.86  | -0.845                          | 7.5                     | 1,19 | 0.013          |
| BASIS-Interpersonal Relationships <sup>b</sup> | 21                             | 2.05  | 20                          | 1.60  | -0.537                          | 3.7                     | 1,19 | 0.071          |
| BASIS-Emotional Lability <sup>b</sup>          | 22                             | 2.21  | 20                          | 1.67  | -0.621                          | 11.8                    | 1,19 | 0.003          |
| BASIS-Psychosis <sup>b</sup>                   | 22                             | 1.37  | 20                          | 1.31  | -0.111                          | 0.3                     | 1,19 | 0.590          |
| BASIS-Substance Abuse <sup>b</sup>             | 22                             | 0.41  | 20                          | 0.27  | -0.364                          | 4.2                     | 1,19 | 0.055          |
| PTSD Checklist <sup>c</sup>                    | 22                             | 63.64 | 20                          | 49.00 | -0.979                          | 20.7                    | 1,19 | 0.001          |
| Activity level <sup>d</sup>                    | 20                             | 2.22  | 20                          | 2.47  | 0.644                           | 10.5                    | 1,19 | 0.004          |
| Happiness <sup>e</sup>                         | 22                             | 2.41  | 20                          | 3.05  | 0.874                           | 8.1                     | 1,19 | 0.010          |
| Quality of life <sup>f</sup>                   | 22                             | 4.09  | 19                          | 7.16  | 1.952                           | 45.3                    | 1,18 | 0.001          |

\*Note: As a result of limitations in design, results should be interpreted with caution and should not be used to infer effectiveness of service dogs. Rather, results indicate that it is feasible to collect these data, and effect sizes suggest that future research is warranted.

<sup>a</sup>VR-12 is the Veterans RAND 12 Item Health Survey. Possible scores can range from 1 to 100 with higher scores indicating better health. A normed mean of 50 and SD=10 are calculated for the veteran population. Participants' scores ranged from 21.1 to 64.2 on the Mental Component Summary (MCS) and ranged from 27.1 to 59.0 on the Physical Component Summary (PCS) (1).

<sup>b</sup>The BASIS-24 subscales are scored on scales from 0 to 4 with higher scores indicating worse functioning or health. Subscale ranges for participants were as follows: depression 0 to 3.9; international relationships 0 to 3.7; emotional lability 0 to 4; psychosis 0 to 3.5; substance abuse 0 to 2.2. We did not include two items assessing suicidal ideation or intent to harm others and were unable to produce the total BASIS score (2).

<sup>c</sup>PTSD Checklist: Responses are Likert-scales where 1 = "not at all" and 5 = "extremely." Possible scores range from 17 to 85 with higher scores indicating worse PTSD symptoms, and a score of 50 considered to be positive for PTSD in military populations. Participants' scores ranged from 19 to 85 (3, 4).

<sup>d</sup>Activity level represents a mean activity level across 25 possible activities. Responses for the past four weeks could range from 1 (not at all) to 5 (at least every day) with higher scores indicating greater levels of activity. Consistent with our previous work (5), mean activity level was calculated across all 25 possible. Participant scores ranged from 1.48 to 3.24.

<sup>e</sup>General happiness, from the General Social Survey (6), responses could range from 1 (not at all) to 4 (very) with higher scores indicating greater reported happiness. Participant scores ranged from 1-4.

<sup>f</sup>Quality of life was measured on a scale from 1 (worst quality of life) to 10 (best quality of life) with higher scores indicating better quality of life. The item came from the Wisconsin Quality of Life Index (7), Participant scores ranged from 1-10.

1. Selim AJ, Rogers W, Fleishman JA, et al.: Updated U.S. population standard for the Veterans RAND 12-item Health Survey (VR-12). *Qual Life Res* 18:43-52, 2009
2. Eisen SV, Normand SL, Belanger AJ, et al.: The Revised Behavior and Symptom Identification Scale (BASIS-R): reliability and validity. *Med Care* 42:1230-41, 2004
3. Hoge CW, Castro CA, Messer SC, et al.: Combat duty in Iraq and Afghanistan, mental health problems, and barriers to care. *NEJM* 351:13-22, 2004
4. Hoge CW, Terhakopian A, Castro CA, et al.: Association of posttraumatic stress disorder with somatic symptoms, health care visits, and absenteeism among Iraq war veterans. *Am J Psychiatry* 164:150-3, 2007
5. Hendryx M, Green CA, Perrin NA: Social support, activities, and recovery from serious mental illness: STARS study findings. *The Journal of Behavioral Health Services & Research* 36:320-9, 2008
6. National Opinion Research Center: General Social Survey; in National Opinion Research Center (NORC), 2012
7. Becker M, Diamond R, Sainfort F: A new patient focused index for measuring quality of life in persons with severe and persistent mental illness. *Qual Life Res* 2:239-51, 1993
