# Supplementary material for: An Observational Study of Service Dogs for Veterans With Posttraumatic Stress Disorder
Source: Atypon-hosted journal article supplement (doi:10.1176/appi.ps.201500383), 2017-03-15
Supplement: appi.ps.201500383.ds002.pdf [file appi.ps.201500383.ds002.pdf]

**Supplementary Table 2. Scores of veterans with and without service dogs, with veterans grouped according to whether they had dogs less than 12 months or greater than 12 months.\***

|                                                | Waiting for Service Dog |      | Has had service dog less than 12 months |      | Has had service dog 12 months or longer |      |
|------------------------------------------------|-------------------------|------|-----------------------------------------|------|-----------------------------------------|------|
|                                                | n                       | Mean | n                                       | Mean | n                                       | Mean |
| VR-12 PCS <sup>a</sup>                         | 31                      | 40.7 | 20                                      | 40.6 | 21                                      | 40.8 |
| VR-12 MCS <sup>a</sup>                         | 31                      | 35.4 | 20                                      | 43.2 | 21                                      | 42.3 |
| BASIS-Depression <sup>b</sup>                  | 32                      | 2.6  | 20                                      | 1.7  | 21                                      | 1.7  |
| BASIS-Interpersonal Relationships <sup>b</sup> | 30                      | 2.4  | 20                                      | 1.5  | 21                                      | 1.9  |
| BASIS-Emotional Lability <sup>b</sup>          | 32                      | 2.2  | 20                                      | 1.6  | 21                                      | 1.8  |
| BASIS-Psychosis <sup>b</sup>                   | 32                      | 1.3  | 20                                      | 1.2  | 21                                      | 0.9  |
| BASIS-Substance Abuse <sup>b</sup>             | 31                      | 0.6  | 20                                      | 0.2  | 21                                      | 0.2  |
| PTSD Checklist <sup>c</sup>                    | 32                      | 67.0 | 20                                      | 46.4 | 20                                      | 53.9 |
| Activity level <sup>d</sup>                    | 32                      | 2.2  | 20                                      | 2.5  | 21                                      | 2.4  |
| Happiness <sup>e</sup>                         | 33                      | 2.2  | 20                                      | 3.1  | 21                                      | 3.0  |
| Quality of life <sup>f</sup>                   | 31                      | 4.5  | 20                                      | 7.3  | 21                                      | 6.4  |

\*Note that one veteran with a service dog at baseline is grouped with those receiving study dogs as that person had had a dog for less than 12 months.

<sup>a</sup>VR-12 is the Veterans RAND 12-Item Health Survey. Possible scores can range from 1 to 100 with higher scores indicating better health. Values are normed for the veteran population to a mean of 50 and standard deviation of 10. Participants ranged from 21.1 to 64.2 on the Mental Component Summary (MCS) and ranged from 27.1 to 59.0 on the Physical Component Summary (PCS).(24)

<sup>b</sup>The BASIS-24 subscales are scored on scales from 0 to 4 with higher scores indicating worse functioning or health. Subscale ranges for participants were as follows: depression 0 to 3.9; international relationships 0 to 3.7; emotional lability 0 to 4; psychosis 0 to 3.5; substance abuse 0 to 2.2. We did not include two items assessing suicidal ideation or intent to harm others and were unable to produce the total BASIS score.(29)

<sup>c</sup>PTSD Checklist: Responses are Likert-scales where 1 = "not at all" and 5 = "extremely." Possible scores range from 17 to 85 with higher scores indicating greater PTSD symptoms and a score of 50 considered to be positive for PTSD in military populations. Participants' scores ranged from 19 to 85.(14, 25)

<sup>d</sup>Activity level represents a mean activity level across 25 possible activities. Responses for the past four weeks could range from 1 (not at all) to 5 (at least every day) with

higher scores indicating greater levels of activity. Participant scores ranged from 1.48 to 3.24.

<sup>e</sup>General happiness responses could range from 1 (not at all) to 4 (very) with higher scores indicating greater reported happiness. Participant scores ranged from 1-4.

<sup>f</sup>Quality of life was measured on a scale from 1 (worst quality of life) to 10 (best quality of life) with higher scores indicating better quality of life. Participant scores ranged from 1-10.
